# Supplementary material for: Transcriptomics and Metabolomics Reveal Purine and Phenylpropanoid Metabolism Response to Drought Stress in Dendrobium sinense, an Endemic Orchid Species in Hainan Island
Source: Front Genet. 2021 Jul 2;12:692702. doi: 10.3389/fgene.2021.692702 (PMC8283770; doi:10.3389/fgene.2021.692702)
Supplement: Supplementary Table 3 — Significantly enriched KEGG pathways. [file Table_3.XLSX]

## Sheet: Sheet1
Table S3 Significantly enriched KEGG pathways
Group	Kegg pathway	ko id	P-value
DSAvsDSB	Degradation of aromatic compounds	ko01220	0.00573781
	Naphthalene degradation	ko00626	0.0124294
	Glycerophospholipid metabolism	ko00564	0.0233832
	Microbial metabolism in diverse environments	ko01120	0.0365066
DSAvsDSC	Glycerolipid metabolism	ko00561	1.13926e-07
	Starch and sucrose metabolism	ko00500	0.00029323
	Fat digestion and absorption	ko04975	0.000422623
	Vitamin digestion and absorption	ko04977	0.00649893
	Degradation of aromatic compounds	ko01220	0.0144334
	Carbohydrate digestion and absorption	ko04973	0.0150342
	Insulin secretion	ko04911	0.0175007
	Insulin resistance	ko04931	0.0175007
	Biofilm formation - Vibrio cholerae	ko05111	0.0175007
	Thyroid hormone synthesis	ko04918	0.0175007
	Galactose metabolism	ko00052	0.0233015
	Amino sugar and nucleotide sugar metabolism	ko00520	0.0316953
	Biosynthesis of phenylpropanoids	ko01061	0.0330515
	Phosphotransferase system (PTS)	ko02060	0.040347
	Neomycin, kanamycin and gentamicin biosynthesis	ko00524	0.0427975
	Ubiquinone and other terpenoid-quinone biosynthesis	ko00130	0.0454778
DSBvsDSC	Olfactory transduction	ko04740	0.00294536
	Anthocyanin biosynthesis	ko00942	0.00932626
	Aldosterone synthesis and secretion	ko04925	0.0120202
	Chagas disease (American trypanosomiasis)	ko05142	0.0127489
	Amoebiasis	ko05146	0.0127489
	Thermogenesis	ko04714	0.0127489
	cGMP-PKG signaling pathway	ko04022	0.0294867
	Starch and sucrose metabolism	ko00500	0.0294867
	Neomycin, kanamycin and gentamicin biosynthesis	ko00524	0.0294867
	Pentose and glucuronate interconversions	ko00040	0.0294867
	Renin secretion	ko04924	0.0421595
	Regulation of lipolysis in adipocytes	ko04923	0.0421595
	Longevity regulating pathway	ko04211	0.0421595
	Amyotrophic lateral sclerosis (ALS)	ko05014	0.0421595
	Flavonoid biosynthesis	ko00941	0.045947

## Sheet: Sheet2
#Kegg_pathway	ko_id	P-value
Glycerolipid metabolism	ko00561	1.13926e-07
Starch and sucrose metabolism	ko00500	0.00029323
Fat digestion and absorption	ko04975	0.000422623
Vitamin digestion and absorption	ko04977	0.00649893
Degradation of aromatic compounds	ko01220	0.0144334
Carbohydrate digestion and absorption	ko04973	0.0150342
Insulin secretion	ko04911	0.0175007
Insulin resistance	ko04931	0.0175007
Biofilm formation - Vibrio cholerae	ko05111	0.0175007
Thyroid hormone synthesis	ko04918	0.0175007
Galactose metabolism	ko00052	0.0233015
Amino sugar and nucleotide sugar metabolism	ko00520	0.0316953
Biosynthesis of phenylpropanoids	ko01061	0.0330515
Phosphotransferase system (PTS)	ko02060	0.040347
Neomycin, kanamycin and gentamicin biosynthesis	ko00524	0.0427975
Ubiquinone and other terpenoid-quinone biosynthesis	ko00130	0.0454778

## Sheet: Sheet3
#Kegg_pathway	ko_id	P-value
Olfactory transduction	ko04740	0.00294536
Anthocyanin biosynthesis	ko00942	0.00932626
Aldosterone synthesis and secretion	ko04925	0.0120202
Chagas disease (American trypanosomiasis)	ko05142	0.0127489
Amoebiasis	ko05146	0.0127489
Thermogenesis	ko04714	0.0127489
cGMP-PKG signaling pathway	ko04022	0.0294867
Starch and sucrose metabolism	ko00500	0.0294867
Neomycin, kanamycin and gentamicin biosynthesis	ko00524	0.0294867
Pentose and glucuronate interconversions	ko00040	0.0294867
Renin secretion	ko04924	0.0421595
Regulation of lipolysis in adipocytes	ko04923	0.0421595
Longevity regulating pathway	ko04211	0.0421595
Amyotrophic lateral sclerosis (ALS)	ko05014	0.0421595
Flavonoid biosynthesis	ko00941	0.045947
